# Supplementary material for: Synthesis of biscarboxylic acid functionalised EDTA mimicking polymers and their ability to form Zr(iv) chelation mediated nanostructures
Source: Royal Society of Chemistry journal article supplement (doi:10.1039/d0py00304b), 2020-01-01

## Supporting information

### **Synthesis of biscalboxylic acid functionalised EDTA mimicking polymers and their ability to form Zr(IV) chelation mediated nanostructures**

Meike N. Leiske,<sup>a</sup> Julia A. Walker,<sup>a,b</sup> Aadarash Zia,<sup>a</sup> Nicholas L. Fletcher,<sup>c</sup> Kristofer J. Thurecht,<sup>c</sup> Thomas P. Davis,<sup>\*,a,c</sup> Kristian Kempe<sup>\*,a,d</sup>

<sup>a</sup>ARC Centre of Excellence in Convergent Bio-Nano Science & Technology, and Drug Delivery, Disposition and Dynamics, Monash Institute of Pharmaceutical Sciences, Monash University, Parkville, VIC 3052, Australia

<sup>b</sup>Department of Chemical Engineering, Monash University, Clayton, Victoria, 3800, Australia

<sup>c</sup>Centre for Advanced Imaging (CAI) and Australian Institute for Bioengineering and Nanotechnology, ARC Centre of Excellence in Convergent Bio-Nano Science and Technology and ARC Training Centre for Innovation in Biomedical Imaging Technology, The University of Queensland, St. Lucia, QLD 4072, Australia

<sup>d</sup>Materials Science and Engineering, Monash University, Clayton, VIC 3800, Australia

## Figures

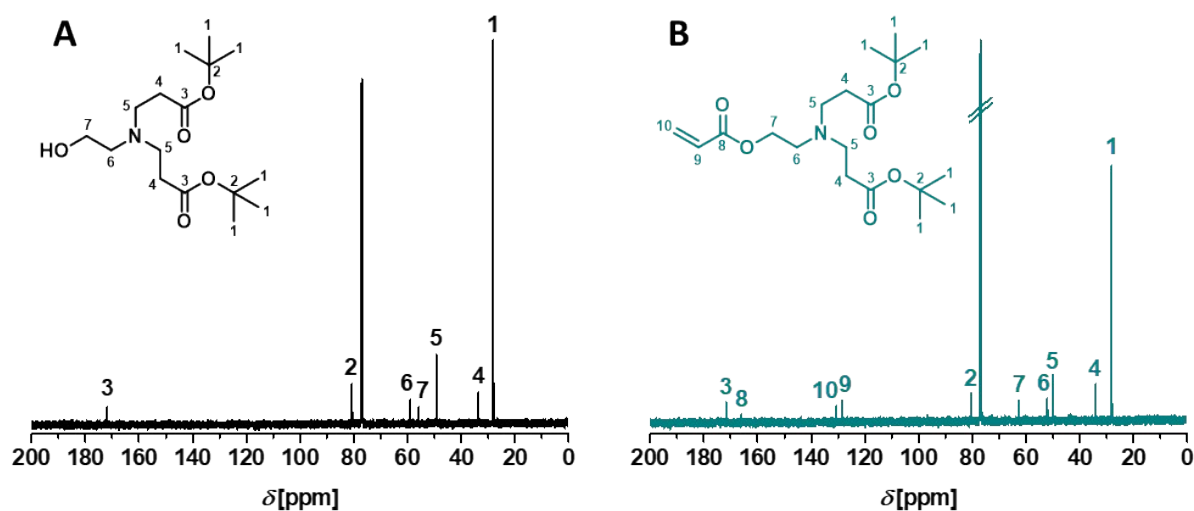

Fig

ure S1.  $^{13}\text{C}$  NMR (400 MHz,  $\text{CDCl}_3$ ) of 1 (A) and tbAEAP (B).

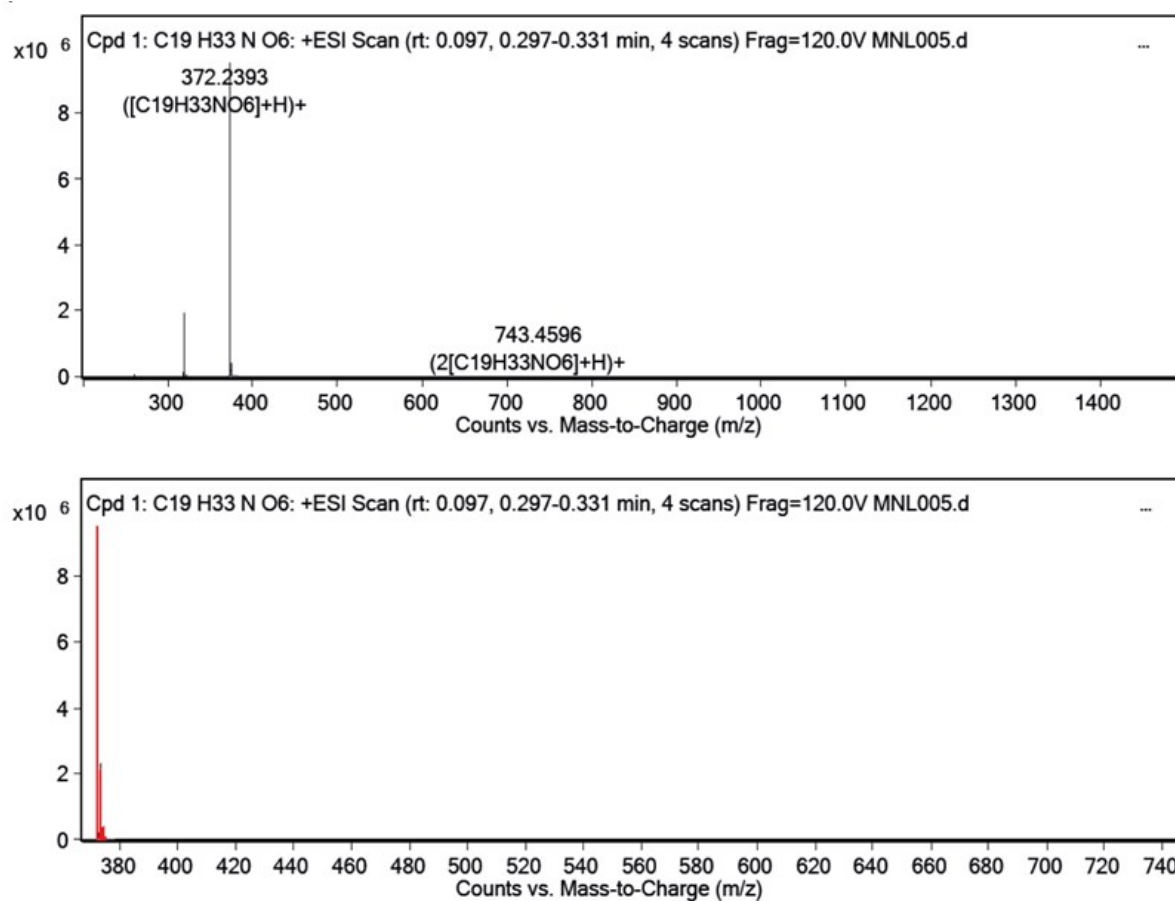

Fig

re S2. HR ESI-MS of tBuAEAP. Top: Full spectrum. Bottom: Magnification of the area of  $m/z$  370 to 750. Black: Experimental data. Red: Calculated data.

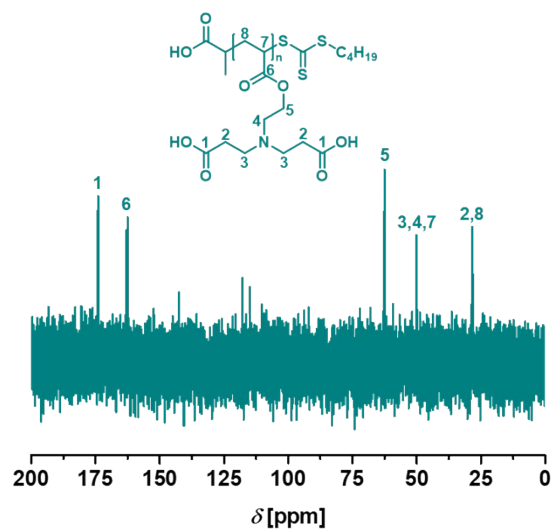

Figure S3.  $^{13}\text{C}$  NMR (400 MHz,  $\text{D}_2\text{O}$ ) of deprotected homopolymer PAEAP.

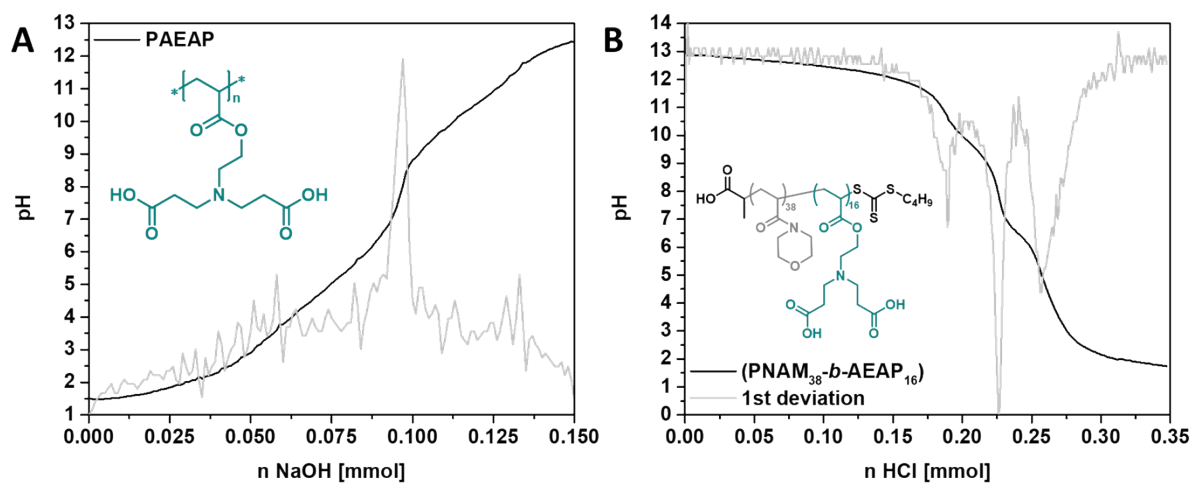

Fig

ure S4. Titration of AEAP containing polymers ( $10 \text{ mg mL}^{-1}$  in MQ). (A) Dependency of pH value on amount of NaOH (0.1 M) added to a solution of PAEAP. (B) Dependency of pH value on amount of HCl (0.1 M) added to a solution of PNAM<sub>38</sub>-b-PAEAP<sub>16</sub>.

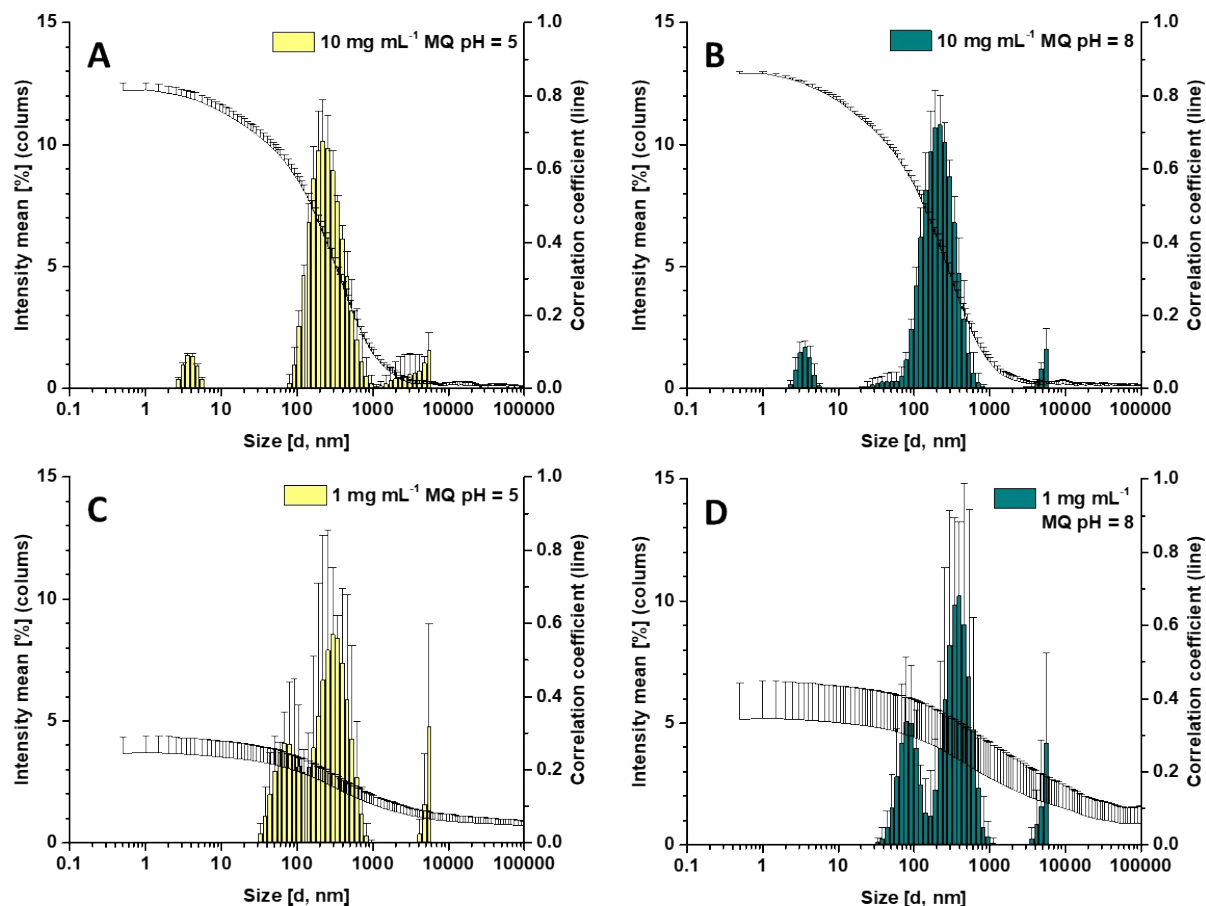

Fig

ure S5. Mean intensity distribution and correlation coefficient of different complexes of  $\text{PNAM}_{38}\text{-}b\text{-PAEAP}_{16}$  at different concentrations and pH values as determined by DLS measurements. Data represents the mean of three measurements with three runs each.

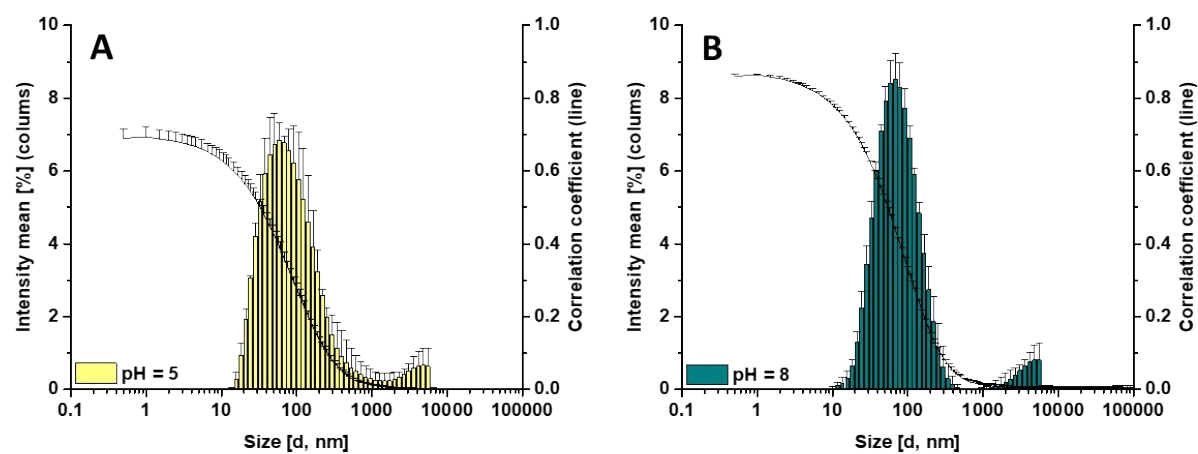

Fig

ure S6. Mean intensity distribution and correlation coefficient of different complexes of  $\text{PNAM}_{38}\text{-}b\text{-PAEAP}_{16}$  and  $\text{Fe(III)}$  as determined by DLS measurements. Polymer concentration:  $1 \text{ mg mL}^{-1}$  in MQ.  $1.0 \text{ eq. Fe(III) per RU}$ . Data represents the mean of three measurements with three runs each. A:  $\text{pH} = 5$ . B:  $\text{pH} = 8$ .

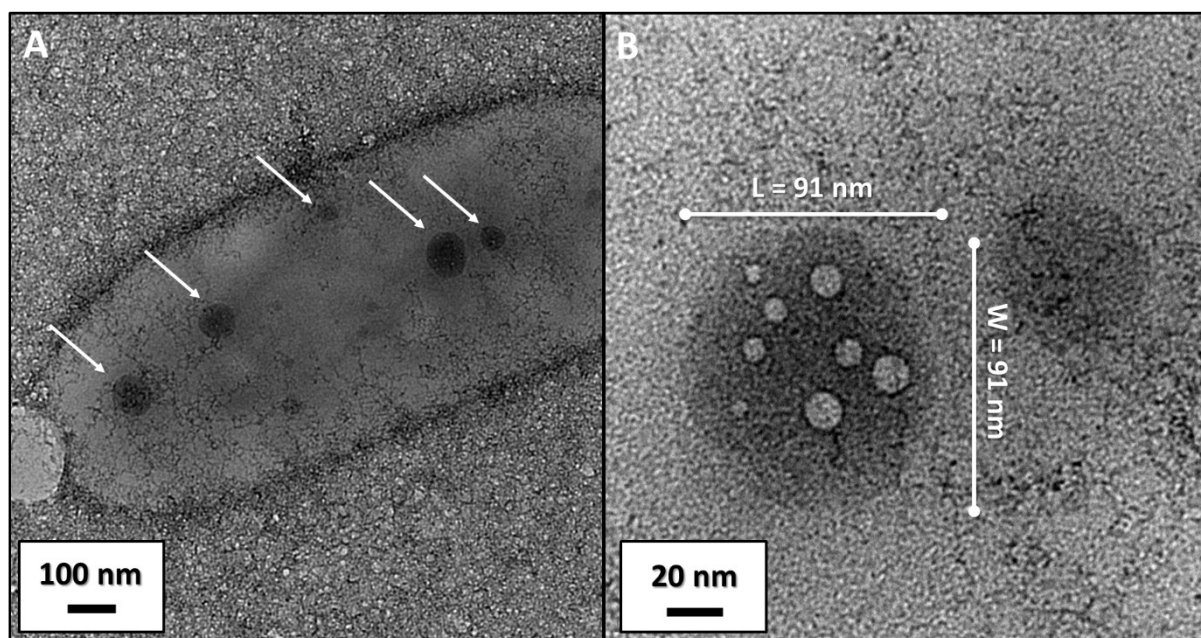

Figure S7. (A and B) TEM images of metal complexation mediated nano-assembly of PNAM<sub>38</sub>-*b*-PAEAP<sub>16</sub> with 1 eq of Fe(III) at pH = 5 in MQ. (B) Magnification of A.

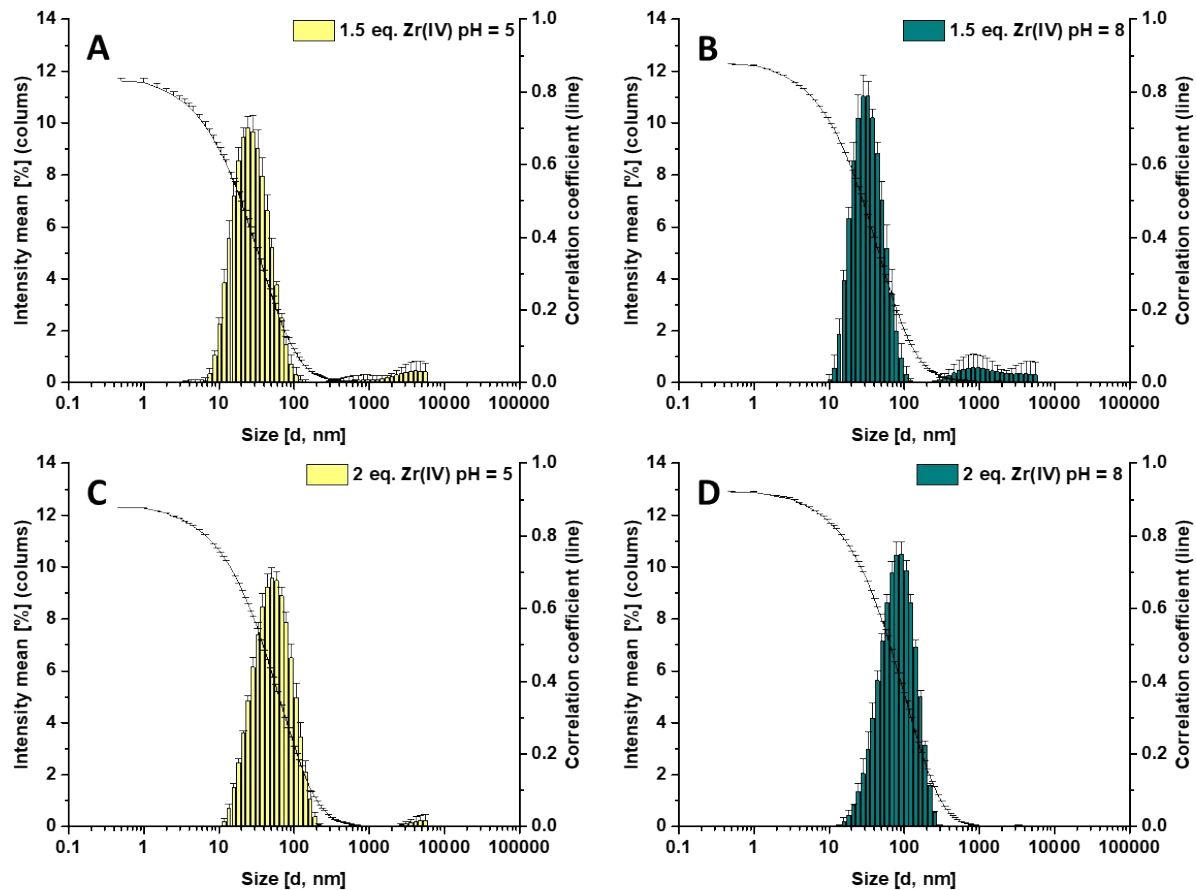

Fig

ure S8. Mean intensity distribution and correlation coefficient of different complexes of PNAM<sub>38</sub>-*b*-AEAP<sub>16</sub> and Zr(IV) as determined by DLS measurements. Data represents the mean of three measurements with three runs each. (A) 1.5 eq Zr(IV) per RU, pH = 5. (B) 1.5 eq Zr(IV) per RU, pH = 8. (C) 2 eq Zr(IV) per RU, pH = 5. (D) 2 eq Zr(IV) per RU, pH = 8.

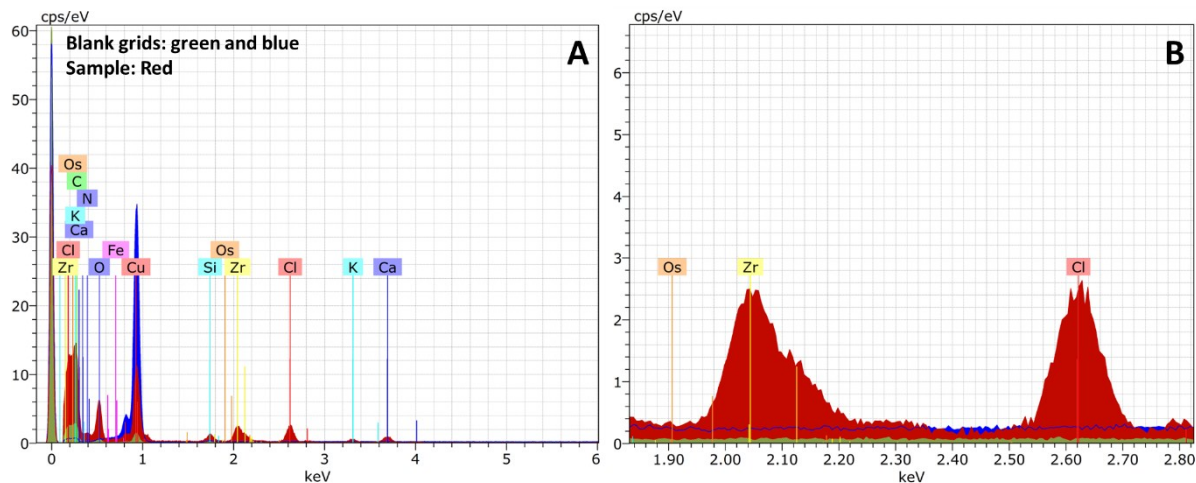

Figure S9. EDX of nanostructures of PNAM<sub>38</sub>-*b*-AEAP<sub>16</sub> assembled using 2 eq of Zr(IV) in MQ at a pH value of 5.

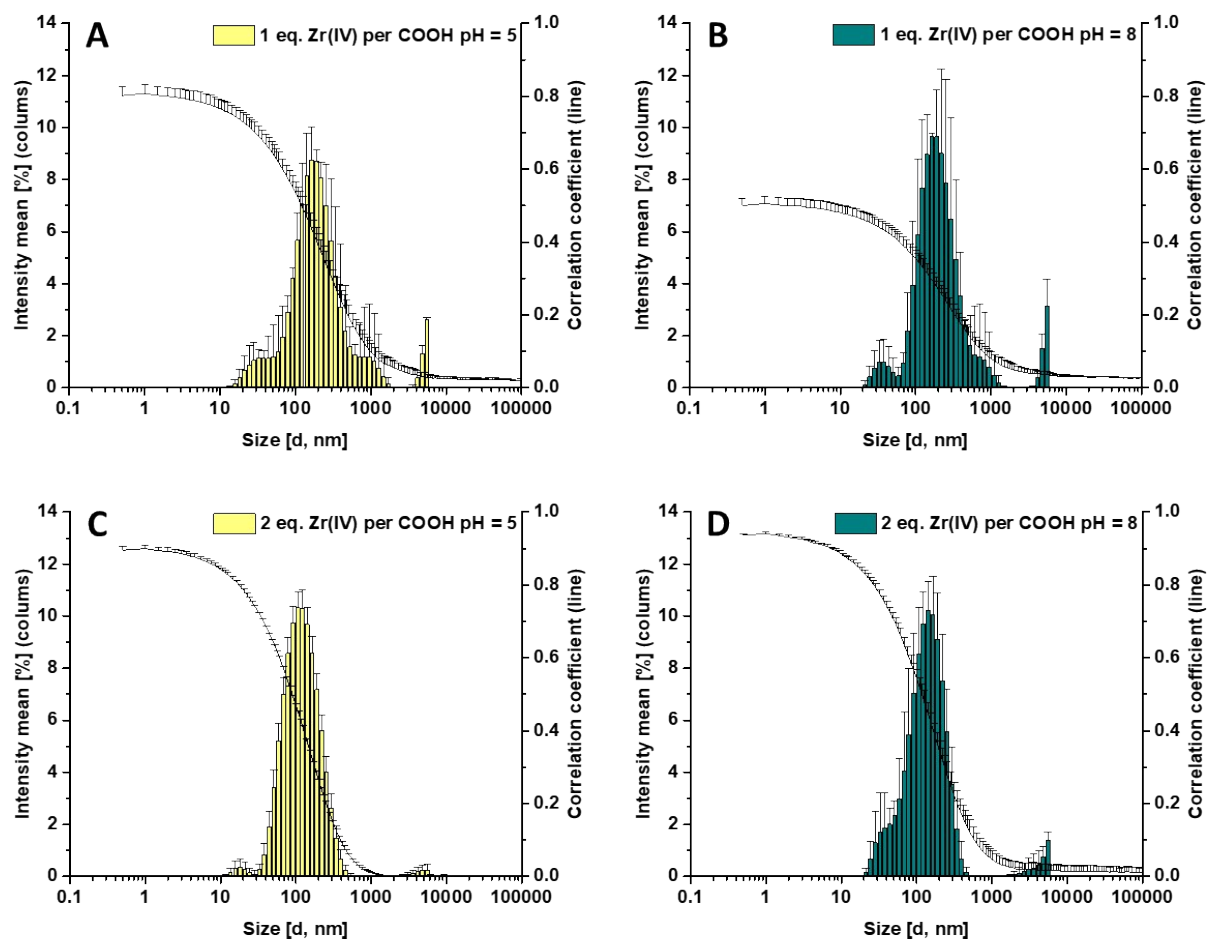

Figure S10. Mean intensity distribution and correlation coefficient of different complexes of PNAM<sub>38</sub>-*b*-AA<sub>16</sub> and Zr(IV) as determined by DLS measurements. Polymer concentration: 1 mg mL<sup>-1</sup> in MQ. Data represents the mean of three measurements with three runs each.



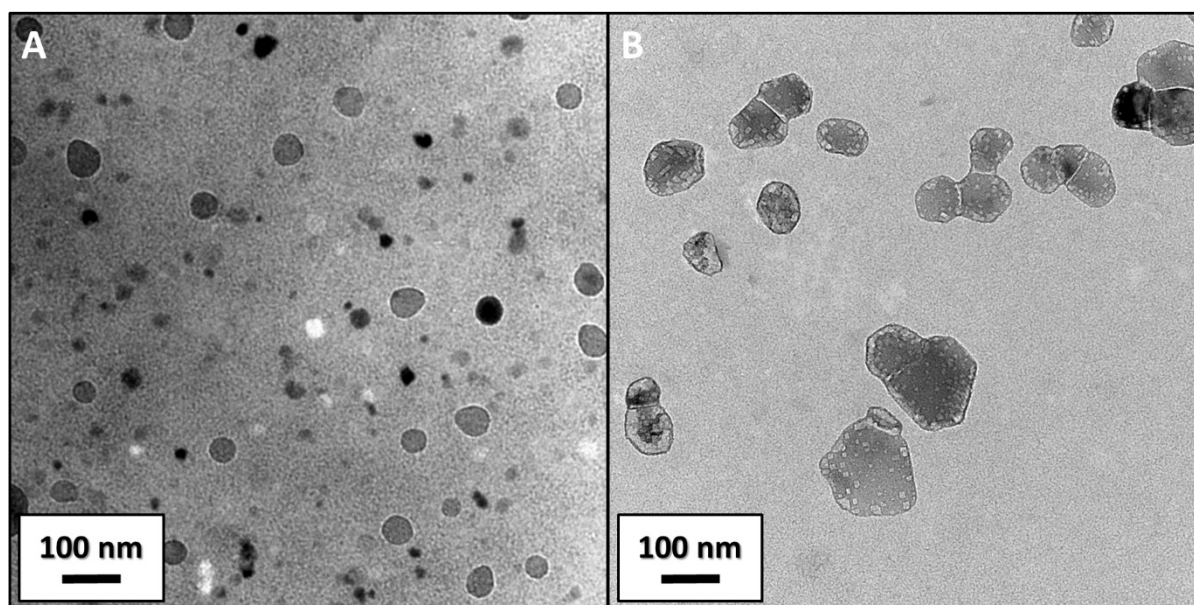

Figure S11. TEM images of metal complexation mediated nano-assembly of PNAM<sub>38</sub>-b-PAA<sub>16</sub> incubated with 2 eq Zr(IV) per COOH at (A) pH = 5, and (B) pH = 8.

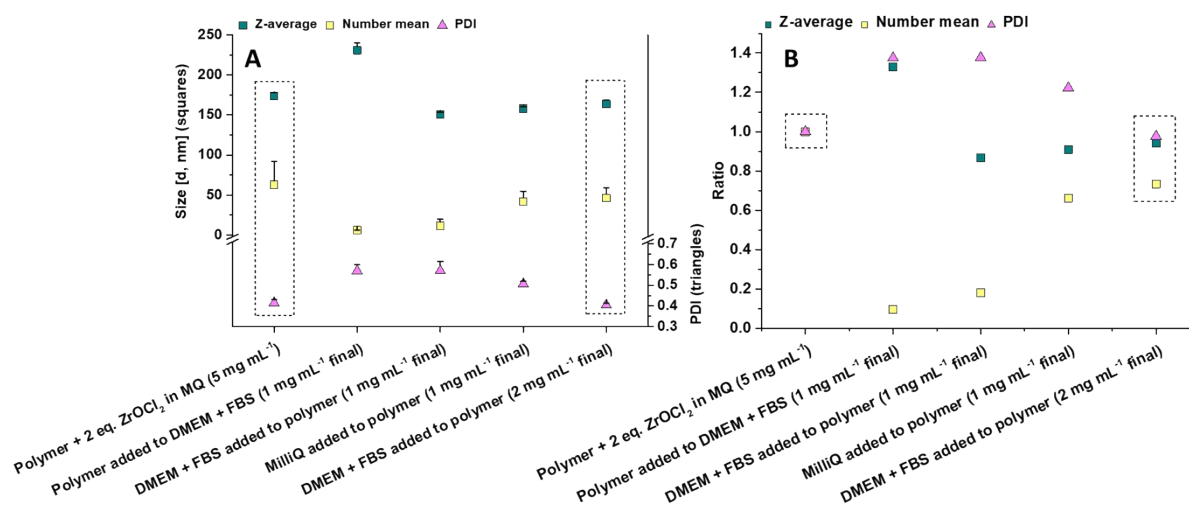

Figure S12. DLS results of Zr-polymer complexes in the presence of FBS containing cell culture media. PNAM<sub>38</sub>-b-AEAP<sub>16</sub> was dissolved in 1 mL MQ (5 mg mL<sup>-1</sup>) two equivalents per AEAP repeating unit of Zr(IV) have been added from an 0.1 M solution in MQ and 100  $\mu$ L 0.1 M NaOH solution were added. Zr-polymer complex solutions have been diluted as indicated. Values represent the mean and SD of three measurements with three runs each. (A) Z-average, number mean and PDI obtained by DLS measurements. (B) Size and dispersity ratios obtained by division of each value by the value of the initial solution (5 mg mL<sup>-1</sup> in MQ). Data represents the mean of three measurements with three runs each.



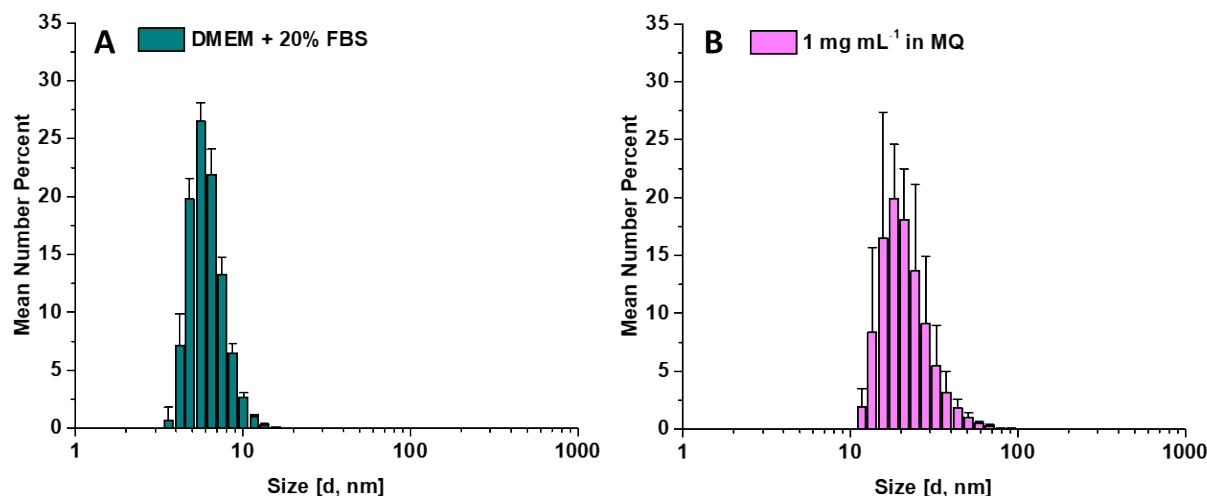

Figure S13. DLS (mean number percent) of (A) serum containing cell media, and (B) complexes of PNAM<sub>38</sub>-*b*-AEAP<sub>16</sub> and Zr(IV) in MQ (2 eq Zr(IV) per RU, 1 mg mL<sup>-1</sup>, pH = 8). Data represents the mean and SD of three measurements with three runs each.

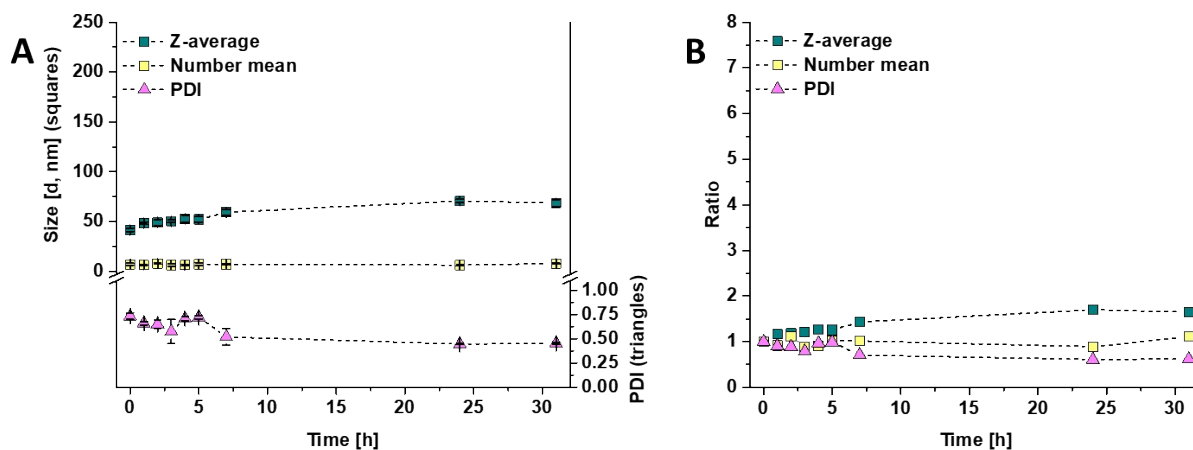

Figure S14. Time dependent stability of complexes of PNAM<sub>38</sub>-*b*-AEAP<sub>16</sub> and Zr(IV) (2 eq. Zr(IV) per RU) in DMEM + 20% FBS determined by DLS measurements. Polymer concentration: 2 mg mL<sup>-1</sup>. (A) Size and PDI. Values represent the mean and SD) of three measurements with three runs each. (B) Size and dispersity ratios obtained by division of each value by the value of the initial solution (t = 0 h).

## Tables

Table S1. Evaluation of complexation experiments of PNAM<sub>38</sub>-*b*-AEAP<sub>16</sub> and different amounts of Fe(III) by DLS measurements. Data represents the mean and SD of three measurements with three runs each.

| Eq. of Fe(III) per RU | pH = 5            |                     |             |             | pH = 8            |                     |             |             |
|-----------------------|-------------------|---------------------|-------------|-------------|-------------------|---------------------|-------------|-------------|
|                       | Z-average [d, nm] | Number mean [d, nm] | PDI         | Intercept   | Z-average [d, nm] | Number mean [d, nm] | PDI         | Intercept   |
| <b>0.0</b>            | 446 ± 75          | 49 ± 11             | 0.49 ± 0.03 | 0.45 ± 0.04 | 677 ± 252         | 58 ± 17             | 0.72 ± 0.31 | 0.54 ± 0.08 |
| <b>0.7</b>            | 127 ± 1           | 38 ± 5              | 0.43 ± 0.02 | 0.92 ± 0.01 | 109 ± 3           | 41 ± 15             | 0.31 ± 0.02 | 0.94 ± 0.00 |
| <b>1.0</b>            | 66 ± 2            | 22 ± 2              | 0.38 ± 0.02 | 0.84 ± 0.02 | 65 ± 2            | 18 ± 5              | 0.30 ± 0.04 | 0.93 ± 0.00 |
| <b>1.3</b>            | 85 ± 1            | 28 ± 8              | 0.31 ± 0.03 | 0.94 ± 0.00 | 90 ± 2            | 30 ± 4              | 0.33 ± 0.04 | 0.93 ± 0.01 |

Table S2. Evaluation of complexation experiments of PNAM<sub>38</sub>-*b*-AEAP<sub>16</sub> and different amounts of Zr(IV) by DLS measurements. Data represents the mean and SD of three measurements with three runs each.

| Eq. of Zr(IV) per RU | pH = 5            |                     |             |             | pH = 8              |                     |             |             |
|----------------------|-------------------|---------------------|-------------|-------------|---------------------|---------------------|-------------|-------------|
|                      | Z-average [d, nm] | Number mean [d, nm] | PDI         | Intercept   | Z-average [d, nm]   | Number mean [d, nm] | PDI         | Intercept   |
| <b>0.0</b>           | 446 ± 75          | 49 ± 11             | 0.49 ± 0.03 | 0.45 ± 0.04 | 677 ± 252           | 58 ± 17             | 0.72 ± 0.31 | 0.54 ± 0.08 |
| <b>0.5</b>           | 80 ± 40           | 9 ± 1               | 0.64 ± 0.11 | 0.67 ± 0.03 | 53 ± 17             | 6 ± 3               | 0.72 ± 0.16 | 0.88 ± 0.02 |
| <b>1.0</b>           | 25 ± 1            | 9 ± 1               | 0.54 ± 0.01 | 0.81 ± 0.02 | 30 ± 1              | 13 ± 0              | 0.44 ± 0.01 | 0.77 ± 0.03 |
| <b>1.5</b>           | 25 ± 1            | 9 ± 3               | 0.26 ± 0.04 | 0.92 ± 0.01 | 32 ± 1              | 16 ± 2              | 0.26 ± 0.01 | 0.94 ± 0.00 |
| <b>2.0</b>           | 45 ± 0            | 17 ± 1              | 0.24 ± 0.01 | 0.94 ± 0.00 | 69 ± 2              | 22 ± 3              | 0.21 ± 0.03 | 0.96 ± 0.00 |
| <b>2.5</b>           | 60 ± 2            | 23 ± 4              | 0.31 ± 0.05 | 0.96 ± 0.00 | 77 ± 0              | 28 ± 4              | 0.25 ± 0.01 | 0.95 ± 0.00 |
| <b>3.0</b>           | 102 ± 0           | 21 ± 1              | 0.28 ± 0.00 | 0.94 ± 0.00 | 819 ± 77            | 121 ± 56            | 1.00 ± 0.00 | 0.94 ± 0.01 |
| <b>0.006</b>         | 194 ± 8           | 49 ± 20             | 0.46 ± 0.03 | 0.96 ± 0.01 | Visible precipitate |                     |             |             |

Table S3. Evaluation different amounts of Zr(IV) in aqueous solution by DLS measurements. Data represents the mean and SD of three measurements with three runs each. \*Equal amounts as depicted in Table S1 have been used without polymer.

| Eq. of Zr(IV) per RU* | pH = 5               |                           |                |             | pH = 8               |                           |                |                |
|-----------------------|----------------------|---------------------------|----------------|-------------|----------------------|---------------------------|----------------|----------------|
|                       | Z-average<br>[d, nm] | Number<br>mean<br>[d, nm] | PDI            | Intercept   | Z-average<br>[d, nm] | Number<br>mean<br>[d, nm] | PDI            | Intercept      |
| <b>0.5</b>            | 1821 ± 929           | 138 ± 92                  | 1.00 ±<br>0.00 | 0.85 ± 0.04 | 1315 ± 305           | 101 ± 36                  | 0.86 ±<br>0.03 | 0.78 ±<br>0.04 |
| <b>1.0</b>            | 217 ± 1              | 62 ± 23                   | 0.49 ±<br>0.02 | 0.94 ± 0.00 | Visible precipitate  |                           |                |                |
| <b>1.5</b>            | 403 ± 71             | 69 ± 34                   | 0.74 ±<br>0.12 | 0.95 ± 0.01 | Visible precipitate  |                           |                |                |
| <b>2.0</b>            | 1114 ± 153           | 90 ± 34                   | 1.00 ±<br>0.00 | 0.94 ± 0.01 | Visible precipitate  |                           |                |                |
| <b>2.5</b>            | 360 ± 15             | 116 ± 63                  | 0.89 ±<br>0.06 | 0.94 ± 0.00 | Visible precipitate  |                           |                |                |
| <b>3.0</b>            | 441 ± 16             | 126 ± 88                  | 0.98 ±<br>0.02 | 0.94 ± 0.01 | Visible precipitate  |                           |                |                |
| <b>4.0</b>            | 419 ± 16             | 92 ± 41                   | 0.87 ±<br>0.11 | 0.92 ± 0.01 | Visible precipitate  |                           |                |                |

## Equations

### 1. Hydrolysis

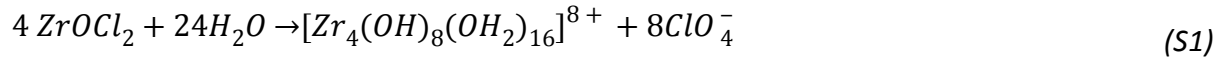

### 2. Formation of anionic complexing agent

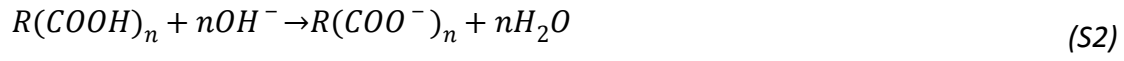

### 3. Complex formation

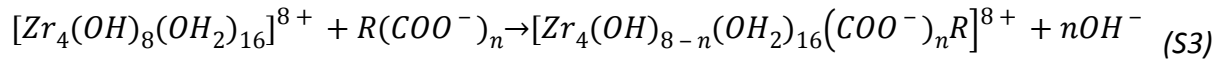

Or

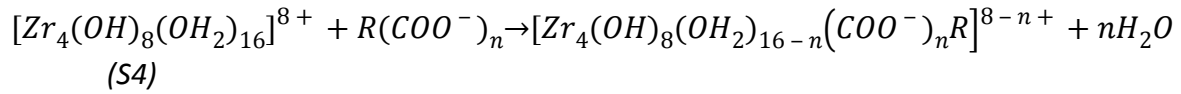

### 4. Polymerisation

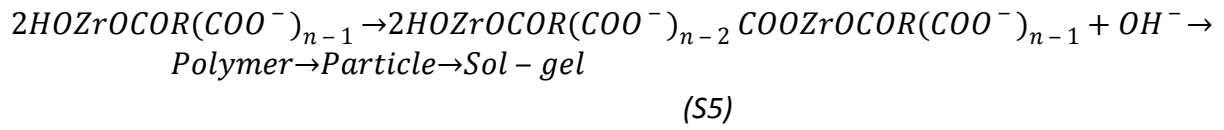

Supplement: d0py00304b1.pdf [file d0py00304b1.pdf]
